# Supplementary material
Source: publisher figshare collection journal article supplement (https://acs.figshare.com/ndownloader/files/5718621)
Supplement: Supplementary file 1 [file 5718621]

# ja0018015.cif


data_pseudor3

_audit_creation_method
;
SHELXL-97, macros written locally, and C. P. Brock
;
_audit_creation_date              '2000-03-11'

_chemical_name_systematic
;
IUPAC name
;
Perchlorophenalenyl
;
_chemical_name_common
;
Common name  (May be omitted)
;
Perchlorophenalenyl
;
_chemical_compound_source
;
Synthesized in the laboratory of R. C. Haddon.
;
_exptl_crystal_preparation
;
Crystals were grown by sublimation
;
_chemical_melting_point            #eg, 102-104_C, 375-377 or 376(1)
248_C
_chemical_formula_moiety
 'C13 Cl9'
_chemical_formula_sum
 'C13 Cl9'
_chemical_formula_weight          475.18

loop_
 _atom_type_symbol
 _atom_type_description
 _atom_type_scat_dispersion_real
 _atom_type_scat_dispersion_imag
 _atom_type_scat_source
 'C'  'C'   0.0033   0.0016
 'International Tables Vol C Tables 4.2.6.8 and 6.1.1.4'
 'Cl'  'Cl'   0.1484   0.1585
 'International Tables Vol C Tables 4.2.6.8 and 6.1.1.4'

_symmetry_cell_setting            trigonal
_symmetry_space_group_name_H-M    'R3m'
_symmetry_Int_Tables_number       160

loop_
 _symmetry_equiv_pos_as_xyz
###
###  To generate a complete molecules while eliminating the
###  disorder remove symmetry operations 4-6, 10-12, and 16-18.
###
 'x, y, z'
 '-y, x-y, z'
 '-x+y, -x, z'
 '-x+y, y, z'
 'x, x-y, z'
 '-y, -x, z'
 'x+2/3, y+1/3, z+1/3'
 '-y+2/3, x-y+1/3, z+1/3'
 '-x+y+2/3, -x+1/3, z+1/3'
 '-x+y+2/3, y+1/3, z+1/3'
 'x+2/3, x-y+1/3, z+1/3'
 '-y+2/3, -x+1/3, z+1/3'
 'x+1/3, y+2/3, z+2/3'
 '-y+1/3, x-y+2/3, z+2/3'
 '-x+y+1/3, -x+2/3, z+2/3'
 '-x+y+1/3, y+2/3, z+2/3'
 'x+1/3, x-y+2/3, z+2/3'
 '-y+1/3, -x+2/3, z+2/3'

_cell_length_a                    18.704(3)
_cell_length_b                    18.704(3)
_cell_length_c                    3.7792(7)
_cell_angle_alpha                 90.
_cell_angle_beta                  90.
_cell_angle_gamma                 120.
_cell_volume                      1145.0(3)
_cell_formula_units_Z             3
_cell_measurement_temperature     299(1)
_cell_measurement_reflns_used     15351
_cell_measurement_theta_min       1.0
_cell_measurement_theta_max       27.5

_exptl_crystal_description
;
Prisms.  The a prism axis is c. The six major faces belong
to the form {1 1 -2 0}.
;
_exptl_crystal_colour             'shiny black'
_exptl_crystal_size_max           0.40
_exptl_crystal_size_mid           0.10
_exptl_crystal_size_min           0.10
_exptl_crystal_density_diffrn     2.067
_exptl_crystal_density_method     'not measured'
_exptl_crystal_F_000              693
_exptl_absorpt_coefficient_mu     1.64
_exptl_absorpt_correction_type    multi-scan
_exptl_absorpt_correction_T_min   0.79
_exptl_absorpt_correction_T_max   0.85
_exptl_absorpt_process_details    'DENZO-SMN (Otwinowski & Minor, 1997)'

_exptl_special_details
;
The crystal-to-detector distance was 40 mm.  Each frame was
measured for 120 s.  The number of scan sets measured was 13;
the total number of frames measured was 1475.
;

_diffrn_ambient_temperature       299(1)
_diffrn_radiation_wavelength      0.71073
_diffrn_radiation_type            MoK\a
_diffrn_radiation_source          'fine-focus sealed tube'
_diffrn_radiation_monochromator   graphite
_diffrn_measurement_device_type   'Nonius Kappa-CCD diffractometer'
_diffrn_measurement_method        '\f and \w scans with 1.0\% steps'
_diffrn_detector_area_resol_mean  18
_diffrn_standards_decay_%         <1.
_diffrn_reflns_number             632
_diffrn_reflns_av_R_equivalents   0.007
_diffrn_reflns_av_sigmaI/netI     0.016
_diffrn_reflns_limit_h_min       -24
_diffrn_reflns_limit_h_max        0
_diffrn_reflns_limit_k_min        0
_diffrn_reflns_limit_k_max        21
_diffrn_reflns_limit_l_min       -4
_diffrn_reflns_limit_l_max        4
_diffrn_reflns_theta_min          2.2
_diffrn_reflns_theta_max          27.5
_reflns_number_total              323
_reflns_number_gt                 318
_reflns_threshold_expression      >2sigma(I)

_computing_data_collection        'COLLECT software (Nonius, 1998)'
_computing_cell_refinement        'DENZO-SMN (Otwinowski & Minor, 1997)'
_computing_data_reduction         'SCALEPACK (Otwinowski & Minor, 1997)'
_computing_structure_solution
;
SIR92 (Altomare, Cascarano, Giacovazzo, Guagliardi, Burla,
Polidori & Camalli, 1994) in maXus (Mackay, Gilmore,
Edwards, Tremayne, Stewart & Shankland, 1998)
;
_computing_structure_refinement   'SHELXL-97 (Sheldrick, 1997)'
_computing_molecular_graphics     'SHELXTL PC (Sheldrick, 1990)'

_refine_special_details
;
The raw intensity data were indexed and averaged in a trigonal
unit cell having a=b=18.704(3)\%A and c=22.675(4)\%A.  The
structure was solved in space group P3c1 (no. 158) with nine
independent molecules in the unit cell, each of which is located
on a threefold rotation axis.  The structure is a modulated
superstructure that presents a number of refinement difficulties.
Refinement in a pseudocell having c=22.675/6=3.7792\%A was,
however, straightforward.  The symmetry operations of the
pseudocell are those of space group R3m (no. 160).  The molecules
appear to be disordered across mirror planes that include the
threefold symmetry axis and the long diagonal of the cell (cell
is referred to hexagonal axes).  The mirror planes and apparent
disorder are a consequence of the c glide planes in group P3c1.

Friedel reflections were merged during refinement.  Refinement
with unmerged data gave a Flack parameter of 0.2(2).
;

_refine_ls_structure_factor_coef  Fsqd
_refine_ls_matrix_type            full
_refine_ls_weighting_scheme       calc
_refine_ls_weighting_details
 'calc w=1/[\s^2^(Fo^2^)+(0.046P)^2^+2.2P] where P=(Fo^2^+2Fc^2^)/3'
_atom_sites_solution_primary      direct
_atom_sites_solution_secondary    difmap
_refine_ls_extinction_method      none
_refine_ls_number_reflns          323
_refine_ls_number_parameters      64
_refine_ls_number_restraints      1
_refine_ls_R_factor_all           0.041
_refine_ls_R_factor_gt            0.040
_refine_ls_wR_factor_ref          0.100
_refine_ls_wR_factor_gt           0.100
_refine_ls_goodness_of_fit_ref    1.07
_refine_ls_restrained_S_all       1.07
_refine_ls_shift/su_max           0.000
_refine_ls_shift/su_mean          0.000

loop_
 _atom_site_label
 _atom_site_type_symbol
 _atom_site_fract_x
 _atom_site_fract_y
 _atom_site_fract_z
 _atom_site_U_iso_or_equiv
 _atom_site_adp_type
 _atom_site_occupancy
 _atom_site_symmetry_multiplicity
 _atom_site_calc_flag
 _atom_site_refinement_flags
 _atom_site_disorder_assembly
 _atom_site_disorder_group
Cl1 Cl 0.9022(3) 0.1444(3) -0.0283(6) 0.107(3) Uani 0.50 1 d P . .
Cl2 Cl 0.7495(2) -0.0176(4) 0.1633(11) 0.1085(15) Uani 0.50 1 d P . .
Cl3 Cl 0.76130(17) -0.1700(2) 0.3276(7) 0.0914(10) Uani 0.50 1 d P . .
C01 C  0.92520(18) 0.07480(18) 0.1112(16) 0.0578(18) Uani 1 2 d S . .
C02 C  0.8440(5) -0.0118(8) 0.154(3) 0.052(2) Uani 0.50 1 d P . .
C03 C  0.8495(4) -0.0867(10) 0.1978(18) 0.036(5) Uani 0.50 1 d P . .
C04 C  0.9263(4) -0.0793(4) 0.153(2) 0.0355(12) Uani 0.50 1 d P . .
C05 C  1.0000 0.0000 0.154(3) 0.0273(12) Uani 1 6 d S . .

loop_
 _atom_site_aniso_label
 _atom_site_aniso_U_11
 _atom_site_aniso_U_22
 _atom_site_aniso_U_33
 _atom_site_aniso_U_23
 _atom_site_aniso_U_13
 _atom_site_aniso_U_12
Cl1 0.196(7) 0.147(6) 0.0708(14) -0.0013(18) -0.012(2) 0.157(6)
Cl2 0.0672(17) 0.226(5) 0.0720(14) 0.013(2) 0.0029(15) 0.103(2)
Cl3 0.0347(12) 0.109(2) 0.0710(17) 0.0122(18) 0.0084(11) -0.0086(11)
C01 0.092(4) 0.092(4) 0.034(3) 0.0007(10) -0.0007(10) 0.080(5)
C02 0.043(4) 0.096(7) 0.037(3) -0.001(4) 0.001(3) 0.050(5)
C03 0.029(3) 0.036(10) 0.035(3) -0.003(3) -0.004(2) 0.009(3)
C04 0.035(3) 0.036(4) 0.028(2) 0.002(3) 0.002(3) 0.012(2)
C05 0.0294(18) 0.0294(18) 0.023(3) 0.000 0.000 0.0147(9)

_geom_special_details
;
The distances and angles are determined for atomic positions
averaged over nine independent molecules.  The values are
reasonably precise but very inaccurate.
;

loop_
 _geom_bond_atom_site_label_1
 _geom_bond_atom_site_label_2
 _geom_bond_distance
 _geom_bond_site_symmetry_2
 _geom_bond_publ_flag
Cl1 C01 1.648(6) . no
Cl2 C02 1.717(7) . no
Cl3 C03 1.679(10) . no
C01 C02 1.580(12) . no
C02 C03 1.464(17) . no
C03 C04 1.383(13) . no
C04 C01 1.315(9) 2_645 no
C04 C05 1.433(5) . no

loop_
 _geom_angle_atom_site_label_1
 _geom_angle_atom_site_label_2
 _geom_angle_atom_site_label_3
 _geom_angle
 _geom_angle_site_symmetry_1
 _geom_angle_site_symmetry_3
 _geom_angle_publ_flag
C04 C01 C02 114.9(6)  3_765 . no
C04 C01 Cl1 134.3(4)  3_765 . no
C02 C01 Cl1 110.2(5)  . . no
C01 C02 C03 120.1(5)  . . no
C01 C02 Cl2 119.9(8)  . . no
C03 C02 Cl2 120.0(8)  . . no
C02 C03 C04 117.2(9)  . . no
C02 C03 Cl3 114.5(8)  . . no
C04 C03 Cl3 128.2(12) . . no
C03 C04 C05 121.1(9)  . . no
C01 C04 C03 114.8(8)  2_645 . no
C01 C04 C05 124.1(6)  2_645 . no
C04 C05 C04 120. .    3_765 no

_diffrn_measured_fraction_theta_max    0.99
_diffrn_reflns_theta_full              27.5
_diffrn_measured_fraction_theta_full   0.99
_refine_diff_density_max    0.24
_refine_diff_density_min   -0.33
_refine_diff_density_rms    0.04

#===END
